# Supplementary material for: The effect of various metal-salts on the sedimentation of soil in a water-based suspension
Source: PLoS One. 2020 Jan 14;15(1):e0227338. doi: 10.1371/journal.pone.0227338 (PMC6959554; doi:10.1371/journal.pone.0227338)
Supplement: S1 Appendix — (XLSX) [file pone.0227338.s001.xlsx]

## Sheet: Data
															Cation	Anion	Concentration	Remove %		Cation	Anion	Concentration	t1 value
															Na	OH	Control	40.318		Na	OH	Control	45.507
															Na	OH	10 mg/l	32.301		Na	OH	10 mg/l	55.682
															Na	OH	20 mg/l	35.965		Na	OH	20 mg/l	53.251
															Na	OH	40 mg/l	37.464		Na	OH	40 mg/l	50.221
															Na	OH	80 mg/l	39.565		Na	OH	80 mg/l	48.86
															Na	Cl	Control	40.318		Na	Cl	Control	45.507
															Na	Cl	10 mg/l	45.776		Na	Cl	10 mg/l	43.43
															Na	Cl	20 mg/l	49.131		Na	Cl	20 mg/l	42.611
															Na	Cl	40 mg/l	48.849		Na	Cl	40 mg/l	43.006
															Na	Cl	80 mg/l	50.312		Na	Cl	80 mg/l	42.441
															Na	SO4	Control	40.467		Na	SO4	Control	51.66
															Na	SO4	10 mg/l	46.168		Na	SO4	10 mg/l	48.651
															Na	SO4	20 mg/l	48.562		Na	SO4	20 mg/l	49.769
															Na	SO4	40 mg/l	48.832		Na	SO4	40 mg/l	49.272
															Na	SO4	80 mg/l	49.501		Na	SO4	80 mg/l	48.004
															Ca	OH	Control	40.467		Ca	OH	Control	51.66
															Ca	OH	10 mg/l	50.78		Ca	OH	10 mg/l	43.572
															Ca	OH	20 mg/l	91.318		Ca	OH	20 mg/l	36.471
															Ca	OH	40 mg/l	92.491		Ca	OH	40 mg/l	26.717
															Ca	OH	80 mg/l	93.05		Ca	OH	80 mg/l	23.525
															Ca	Cl	Control	40.976		Ca	Cl	Control	44.721
															Ca	Cl	10 mg/l	51.413		Ca	Cl	10 mg/l	40.283
															Ca	Cl	20 mg/l	73.803		Ca	Cl	20 mg/l	39.416
															Ca	Cl	40 mg/l	85.805		Ca	Cl	40 mg/l	33.278
															Ca	Cl	80 mg/l	89.307		Ca	Cl	80 mg/l	30.906
															Ca	SO4	Control	40.976		Ca	SO4	Control	44.721
															Ca	SO4	10 mg/l	61.645		Ca	SO4	10 mg/l	49.926
															Ca	SO4	20 mg/l	61.601		Ca	SO4	20 mg/l	49.931
															Ca	SO4	40 mg/l	83.497		Ca	SO4	40 mg/l	45.053
															Ca	SO4	80 mg/l	90.439		Ca	SO4	80 mg/l	37.905
															Mg	Cl	Control	39.809		Mg	Cl	Control	59.537
															Mg	Cl	10 mg/l	58.826		Mg	Cl	10 mg/l	45.712
															Mg	Cl	20 mg/l	85.541		Mg	Cl	20 mg/l	34.996
															Mg	Cl	40 mg/l	86.62		Mg	Cl	40 mg/l	29.878
															Mg	Cl	80 mg/l	88.211		Mg	Cl	80 mg/l	28.853
															Mg	SO4	Control	38.185		Mg	SO4	Control	58.444
															Mg	SO4	10 mg/l	50.498		Mg	SO4	10 mg/l	47.188
															Mg	SO4	20 mg/l	75.103		Mg	SO4	20 mg/l	48.505
															Mg	SO4	40 mg/l	85.286		Mg	SO4	40 mg/l	37.791
															Mg	SO4	80 mg/l	88.114		Mg	SO4	80 mg/l	34.522
															Fe	SO4	Control	38.185		Fe	SO4	Control	58.444
															Fe	SO4	10 mg/l	84.108		Fe	SO4	10 mg/l	33.683
															Fe	SO4	20 mg/l	91.552		Fe	SO4	20 mg/l	30.084
															Fe	SO4	40 mg/l	86.88		Fe	SO4	40 mg/l	29.598
															Fe	SO4	80 mg/l	87.127		Fe	SO4	80 mg/l	27.292
															Al	SO4	Control	39.805		Al	SO4	Control	59.537
															Al	SO4	10 mg/l	85.934		Al	SO4	10 mg/l	26.704
															Al	SO4	20 mg/l	94.48		Al	SO4	20 mg/l	26.41
															Al	SO4	40 mg/l	91.031		Al	SO4	40 mg/l	28.796
															Al	SO4	80 mg/l	91.15		Al	SO4	80 mg/l	29.23

## Sheet: ANOVA.%
	You are using the XLSTAT trial version. Number of days remaining until the trial expires: 8
	XLSTAT 2019.3.2.61685 - ANOVA - Start time: 2019. 10. 04. at 16:42:44 / End time: 2019. 10. 04. at 16:42:46 / Microsoft Excel 16.04588
	Y / Dependent variables: Workbook = S1 Appendix.xlsx / Sheet = Data / Range = Data!$S$20:$S$70 / 50 rows and 1 column
	X / Qualitative: Workbook = S1 Appendix.xlsx / Sheet = Data / Range = Data!$P$20:$R$70 / 50 rows and 3 columns
	Constraints: an=0
	Confidence interval (%): 95
	Tolerance: 0,0001
	Use least squares means: Yes
	:
	Summary statistics (Quantitative data):
	Variable	Observations	Obs. with missing data	Obs. without missing data	Minimum	Maximum	Mean	Std. deviation
	Remove %	50	0	50	32.301	94.48	63.7508	22.0919
	Summary statistics (Qualitative data):
	Variable	Categories	Counts	Frequencies	%
	Cation	Al	5	5	10
		Ca	15	15	30
		Fe	5	5	10
		Mg	10	10	20
		Na	15	15	30
	Anion	Cl	15	15	30
		OH	10	10	20
		SO4	25	25	50
	Concentration	10 mg/l	10	10	20
		20 mg/l	10	10	20
		40 mg/l	10	10	20
		80 mg/l	10	10	20
		Control	10	10	20
	Correlation matrix:
		Cation-Al	Cation-Ca	Cation-Fe	Cation-Mg	Cation-Na	Anion-Cl	Anion-OH	Anion-SO4	Concentration-10 mg/l	Concentration-20 mg/l	Concentration-40 mg/l	Concentration-80 mg/l	Concentration-Control	Remove %
	Cation-Al	1	-0.218218	-0.111111	-0.166667	-0.218218	-0.218218	-0.166667	0.333333	-4.62593e-18	-2.31296e-17	4.62593e-18	-7.40149e-17	-4.62593e-18	0.25498
	Cation-Ca	-0.218218	1	-0.218218	-0.327327	-0.428571	0.047619	0.218218	-0.218218	3.1798e-17	2.42271e-17	-2.19558e-17	1.21135e-17	1.66561e-17	0.182209
	Cation-Fe	-0.111111	-0.218218	1	-0.166667	-0.218218	-0.218218	-0.166667	0.333333	-1.73472e-17	-1.61908e-17	9.25186e-18	-1.38778e-17	-3.5851e-17	0.210633
	Cation-Mg	-0.166667	-0.327327	-0.166667	1	-0.327327	0.218218	-0.25	2.77556e-18	0	0	-4.33681e-18	0	-6.93889e-18	0.134168
	Cation-Na	-0.218218	-0.428571	-0.218218	-0.327327	1	0.047619	0.218218	-0.218218	1.21135e-17	6.05676e-18	-2.27129e-17	-9.08514e-18	3.63406e-17	-0.604135
	Anion-Cl	-0.218218	0.047619	-0.218218	0.218218	0.047619	1	-0.327327	-0.654654	7.57095e-18	6.05676e-18	-2.95267e-17	3.02838e-18	2.27129e-17	-0.0430363
	Anion-OH	-0.166667	0.218218	-0.166667	-0.25	0.218218	-0.327327	1	-0.5	0	0	0	3.46945e-17	0	-0.191563
	Anion-SO4	0.333333	-0.218218	0.333333	2.77556e-18	-0.218218	-0.654654	-0.5	1	2.77556e-18	0	4.16334e-18	0	2.77556e-18	0.192694
	Concentration-10 mg/l	-4.62593e-18	3.1798e-17	-1.73472e-17	0	1.21135e-17	7.57095e-18	0	2.77556e-18	1	-0.25	-0.25	-0.25	-0.25	-0.160173
	Concentration-20 mg/l	-2.31296e-17	2.42271e-17	-1.61908e-17	0	6.05676e-18	6.05676e-18	0	0	-0.25	1	-0.25	-0.25	-0.25	0.159003
	Concentration-40 mg/l	4.62593e-18	-2.19558e-17	9.25186e-18	-4.33681e-18	-2.27129e-17	-2.95267e-17	0	4.16334e-18	-0.25	-0.25	1	-0.25	-0.25	0.249765
	Concentration-80 mg/l	-7.40149e-17	1.21135e-17	-1.38778e-17	0	-9.08514e-18	3.02838e-18	3.46945e-17	0	-0.25	-0.25	-0.25	1	-0.25	0.295538
	Concentration-Control	-4.62593e-18	1.66561e-17	-3.5851e-17	-6.93889e-18	3.63406e-17	2.27129e-17	0	2.77556e-18	-0.25	-0.25	-0.25	-0.25	1	-0.544132
	Remove %	0.25498	0.182209	0.210633	0.134168	-0.604135	-0.0430363	-0.191563	0.192694	-0.160173	0.159003	0.249765	0.295538	-0.544132	1
	Multicolinearity statistics:
		Cation-Al	Cation-Ca	Cation-Fe	Cation-Mg	Cation-Na	Anion-Cl	Anion-OH	Anion-SO4	Concentration-10 mg/l	Concentration-20 mg/l	Concentration-40 mg/l	Concentration-80 mg/l	Concentration-Control
	Tolerance	0.888889	0.936508	0.888889	0.916667	0.936508	0.873016	0.833333	0.733333	1	1	1	1	1
	VIF	1.125	1.0678	1.125	1.09091	1.0678	1.14545	1.2	1.36364	1	1	1	1	1
	Regression of variable Remove %:
	Goodness of fit statistics (Remove %):
	Observations	50
	Sum of weights	50
	DF	39
	R²	0.791004
	Adjusted R²	0.737416
	MSE	128.155
	RMSE	11.3206
	MAPE	16.0769
	DW	1.69857
	Cp	11
	AIC	252.239
	SBC	273.271
	PC	0.32689
	Press	8269.15
	Q²	0.654222
	Analysis of variance (Remove %):
	Source	DF	Sum of squares	Mean squares	F	Pr > F
	Model	10	18916.6	1891.66	14.7607	< 0,0001
	Error	39	4998.05	128.155
	Corrected Total	49	23914.6
	Computed against model Y=Mean(Y)
	Type I Sum of Squares analysis (Remove %):
	Source	DF	Sum of squares	Mean squares	F	Pr > F
	Cation	4	9364.23	2341.06	18.2674	< 0,0001
	Anion	2	48.8143	24.4072	0.19045	0.827351
	Concentration	4	9503.53	2375.88	18.5391	< 0,0001
	Type II Sum of Squares analysis (Remove %):
	Source	DF	Sum of squares	Mean squares	F	Pr > F
	Cation	4	8235.99	2059	16.0664	< 0,0001
	Anion	2	48.8143	24.4072	0.19045	0.827351
	Concentration	4	9503.53	2375.88	18.5391	< 0,0001
	Type III Sum of Squares analysis (Remove %):
	Source	DF	Sum of squares	Mean squares	F	Pr > F
	Cation	4	8235.99	2059	16.0664	< 0,0001
	Anion	2	48.8143	24.4072	0.19045	0.827351
	Concentration	4	9503.53	2375.88	18.5391	< 0,0001
	Model parameters (Remove %):
	Source	Value	Standard error	t	Pr > |t|	Lower bound (95%)	Upper bound (95%)
	Intercept	19.5733	5.02034	3.89879	0.000370168	9.41866	29.7279
	Cation-Al	37.1065	6.37044	5.8248	< 0,0001	24.2211	49.9919
	Cation-Ca	26.2693	4.13368	6.35493	< 0,0001	17.9081	34.6304
	Cation-Fe	34.1969	6.37044	5.36806	< 0,0001	21.3115	47.0823
	Cation-Mg	25.385	4.84717	5.23708	< 0,0001	15.5807	35.1894
	Cation-Na	0	0
	Anion-Cl	1.72153	4.13368	0.416465	0.679353	-6.63963	10.0827
	Anion-OH	-1.13623	4.84717	-0.234411	0.815892	-10.9406	8.6681
	Anion-SO4	0	0
	Concentration-10 mg/l	16.7943	5.06271	3.31726	0.00197528	6.554	27.0346
	Concentration-20 mg/l	30.755	5.06271	6.07481	< 0,0001	20.5147	40.9953
	Concentration-40 mg/l	34.7249	5.06271	6.85896	< 0,0001	24.4846	44.9652
	Concentration-80 mg/l	36.727	5.06271	7.25442	< 0,0001	26.4867	46.9673
	Concentration-Control	0	0
	Equation of the model (Remove %):
	Remove % = 19,57326+37,1065*Cation-Al+26,2692666666667*Cation-Ca+34,1969*Cation-Fe+25,3850333333333*Cation-Mg+1,72153333333333*Anion-Cl-1,13623333333334*Anion-OH+16,7943*Concentration-10 mg/l+30,755*Concentration-20 mg/l+34,7249*Concentration-40 mg/l+36,727*Concentration-80 mg/l
	Standardized coefficients (Remove %):
	Source	Value	Standard error	t	Pr > |t|	Lower bound (95%)	Upper bound (95%)
	Cation-Al	0.509008	0.0873864	5.8248	< 0,0001	0.332252	0.685763
	Cation-Ca	0.550441	0.0866164	6.35493	< 0,0001	0.375243	0.725639
	Cation-Fe	0.469095	0.0873864	5.36806	< 0,0001	0.29234	0.645851
	Cation-Mg	0.464292	0.0886547	5.23708	< 0,0001	0.284971	0.643613
	Cation-Na	0	0
	Anion-Cl	0.0360727	0.0866164	0.416465	0.679353	-0.139126	0.211271
	Anion-OH	-0.0207817	0.0886547	-0.234411	0.815892	-0.200103	0.158539
	Anion-SO4	0	0
	Concentration-10 mg/l	0.307167	0.0925968	3.31726	0.00197528	0.119873	0.494462
	Concentration-20 mg/l	0.562508	0.0925968	6.07481	< 0,0001	0.375214	0.749803
	Concentration-40 mg/l	0.635118	0.0925968	6.85896	< 0,0001	0.447823	0.822412
	Concentration-80 mg/l	0.671736	0.0925968	7.25442	< 0,0001	0.484441	0.859031
	Concentration-Control	0	0
	Predictions and residuals (Remove %):
	Observation	Weight	Remove %	Pred(Remove %)	Residual	Std. residual	Std. dev. on pred. (Mean)	Lower bound 95% (Mean)	Upper bound 95% (Mean)	Std. dev. on pred. (Observation)	Lower bound 95% (Observation)	Upper bound 95% (Observation)
	Obs1	1	40.318	18.437	21.881	1.93285	5.22874	7.8609	29.0132	12.4698	-6.78544	43.6595
	Obs2	1	32.301	35.2313	-2.93033	-0.25885	5.22874	24.6552	45.8075	12.4698	10.0089	60.4538
	Obs3	1	35.965	49.192	-13.227	-1.16841	5.22874	38.6159	59.7682	12.4698	23.9696	74.4145
	Obs4	1	37.464	53.1619	-15.6979	-1.38667	5.22874	42.5858	63.7381	12.4698	27.9395	78.3844
	Obs5	1	39.565	55.164	-15.599	-1.37794	5.22874	44.5879	65.7402	12.4698	29.9416	80.3865
	Obs6	1	40.318	21.2948	19.0232	1.68041	5.02034	11.1402	31.4494	12.3838	-3.75384	46.3434
	Obs7	1	45.776	38.0891	7.68691	0.679022	5.02034	27.9345	48.2437	12.3838	13.0405	63.1377
	Obs8	1	49.131	52.0498	-2.91879	-0.257831	5.02034	41.8952	62.2044	12.3838	27.0012	77.0984
	Obs9	1	48.849	56.0197	-7.17069	-0.633422	5.02034	45.8651	66.1743	12.3838	30.9711	81.0683
	Obs10	1	50.312	58.0218	-7.70979	-0.681043	5.02034	47.8672	68.1764	12.3838	32.9732	83.0704
	Obs11	1	40.467	19.5733	20.8937	1.84565	5.02034	9.41866	29.7279	12.3838	-5.47538	44.6219
	Obs12	1	46.168	36.3676	9.80044	0.86572	5.02034	26.213	46.5222	12.3838	11.3189	61.4162
	Obs13	1	48.562	50.3283	-1.76626	-0.156022	5.02034	40.1737	60.4829	12.3838	25.2796	75.3769
	Obs14	1	48.832	54.2982	-5.46616	-0.482852	5.02034	44.1436	64.4528	12.3838	29.2495	79.3468
	Obs15	1	49.501	56.3003	-6.79926	-0.600612	5.02034	46.1457	66.4549	12.3838	31.2516	81.3489
	Obs16	1	40.467	44.7063	-4.23929	-0.374477	5.22874	34.1302	55.2824	12.4698	19.4838	69.9288
	Obs17	1	50.78	61.5006	-10.7206	-0.947002	5.22874	50.9245	72.0767	12.4698	36.2781	86.7231
	Obs18	1	91.318	75.4613	15.8567	1.4007	5.22874	64.8852	86.0374	12.4698	50.2388	100.684
	Obs19	1	92.491	79.4312	13.0598	1.15364	5.22874	68.8551	90.0073	12.4698	54.2087	104.654
	Obs20	1	93.05	81.4333	11.6167	1.02616	5.22874	70.8572	92.0094	12.4698	56.2108	106.656
	Obs21	1	40.976	47.5641	-6.58806	-0.581955	5.02034	37.4095	57.7187	12.3838	22.5154	72.6127
	Obs22	1	51.413	64.3584	-12.9454	-1.14353	5.02034	54.2038	74.513	12.3838	39.3097	89.407
	Obs23	1	73.803	78.3191	-4.51606	-0.398925	5.02034	68.1645	88.4737	12.3838	53.2704	103.368
	Obs24	1	85.805	82.289	3.51604	0.310589	5.02034	72.1344	92.4436	12.3838	57.2403	107.338
	Obs25	1	89.307	84.2911	5.01594	0.443082	5.02034	74.1365	94.4457	12.3838	59.2424	109.34
	Obs26	1	40.976	45.8425	-4.86653	-0.429884	5.02034	35.6879	55.9971	12.3838	20.7939	70.8912
	Obs27	1	61.645	62.6368	-0.991827	-0.0876129	5.02034	52.4822	72.7914	12.3838	37.5882	87.6855
	Obs28	1	61.601	76.5975	-14.9965	-1.32472	5.02034	66.4429	86.7521	12.3838	51.5489	101.646
	Obs29	1	83.497	80.5674	2.92957	0.258783	5.02034	70.4128	90.722	12.3838	55.5188	105.616
	Obs30	1	90.439	82.5695	7.86947	0.695149	5.02034	72.4149	92.7241	12.3838	57.5209	107.618
	Obs31	1	39.809	46.6798	-6.87083	-0.606933	5.22874	36.1037	57.256	12.4698	21.4574	71.9023
	Obs32	1	58.826	63.4741	-4.64813	-0.410592	5.22874	52.898	74.0503	12.4698	38.2517	88.6966
	Obs33	1	85.541	77.4348	8.10617	0.716058	5.22874	66.8587	88.011	12.4698	52.2124	102.657
	Obs34	1	86.62	81.4047	5.21527	0.46069	5.22874	70.8286	91.9809	12.4698	56.1823	106.627
	Obs35	1	88.211	83.4068	4.80417	0.424376	5.22874	72.8307	93.983	12.4698	58.1844	108.629
	Obs36	1	38.185	44.9583	-6.77329	-0.598318	5.22874	34.3822	55.5344	12.4698	19.7358	70.1808
	Obs37	1	50.498	61.7526	-11.2546	-0.994173	5.22874	51.1765	72.3287	12.4698	36.5301	86.9751
	Obs38	1	75.103	75.7133	-0.610293	-0.0539102	5.22874	65.1372	86.2894	12.4698	50.4908	100.936
	Obs39	1	85.286	79.6832	5.60281	0.494923	5.22874	69.1071	90.2593	12.4698	54.4607	104.906
	Obs40	1	88.114	81.6853	6.42871	0.567879	5.22874	71.1092	92.2614	12.4698	56.4628	106.908
	Obs41	1	38.185	53.7702	-15.5852	-1.37671	5.99028	41.6537	65.8866	12.8078	27.864	79.6763
	Obs42	1	84.108	70.5645	13.5435	1.19637	5.99028	58.448	82.6809	12.8078	44.6583	96.4706
	Obs43	1	91.552	84.5252	7.02684	0.620715	5.99028	72.4087	96.6416	12.8078	58.619	110.431
	Obs44	1	86.88	88.4951	-1.61506	-0.142666	5.99028	76.3786	100.612	12.8078	62.5889	114.401
	Obs45	1	87.127	90.4972	-3.37016	-0.297703	5.99028	78.3807	102.614	12.8078	64.591	116.403
	Obs46	1	39.805	56.6798	-16.8748	-1.49063	5.99028	44.5633	68.7962	12.8078	30.7736	82.5859
	Obs47	1	85.934	73.4741	12.4599	1.10065	5.99028	61.3576	85.5905	12.8078	47.5679	99.3802
	Obs48	1	94.48	87.4348	7.04524	0.62234	5.99028	75.3183	99.5512	12.8078	61.5286	113.341
	Obs49	1	91.031	91.4047	-0.37366	-0.0330072	5.99028	79.2882	103.521	12.8078	65.4985	117.311
	Obs50	1	91.15	93.4068	-2.25676	-0.199351	5.99028	81.2903	105.523	12.8078	67.5006	119.313
	Interpretation (Remove %):
	Given the R2, 79% of the variability of the dependent variable Remove % is explained by the 3 explanatory variables.
	Given the p-value of the F statistic computed in the ANOVA table, and given the significance level of 5%, the information brought by the explanatory variables is significantly better than what a basic mean would bring.
	Based on the Type III sum of squares, the following variables bring significant information to explain the variability of the dependent variable Remove %: Cation,Concentration.
	Based on the Type III sum of squares, the following variables do not bring significant information to explain the variability the dependent variable Remove %: Anion. You might want to remove them from the model.
	Among the explanatory variables, based on the Type III sum of squares, variable Concentration is the most influential.
	LS Means for factor Cation:
	Category	LS mean	Standard error	Lower bound (95%)	Upper bound (95%)
	Al	80.6751	5.66028	69.2261	92.1241
	Ca	69.8379	2.92296	63.9256	75.7501
	Fe	77.7655	5.66028	66.3165	89.2145
	Mg	68.9536	3.86671	61.1325	76.7748
	Na	43.5686	2.92296	37.6564	49.4808
	LS Means for factor Anion:
	Category	LS mean	Standard error	Lower bound (95%)	Upper bound (95%)
	Cl	69.6866	3.45849	62.6911	76.682
	OH	66.8288	4.2859	58.1598	75.4978
	SO4	67.965	2.26411	63.3854	72.5446
	LS Means for factor Concentration:
	Category	LS mean	Standard error	Lower bound (95%)	Upper bound (95%)
	10 mg/l	61.1542	3.86671	53.333	68.9754
	20 mg/l	75.1149	3.86671	67.2937	82.9361
	40 mg/l	79.0848	3.86671	71.2636	86.906
	80 mg/l	81.0869	3.86671	73.2657	88.9081
	Control	44.3599	3.86671	36.5387	52.1811

## Sheet: FeSO4.AlSO4
Two Sample t-test Assuming Equal Variances
	Variable 1	Variable 2
Mean	77.5704	80.48
Variance	491.858	526.344
Observations	5	5
Weighed variance	509.101
Hypothesized Mean Difference	0
df	8
t Stat	-0.203893
P(T<=t) one-tailed	0.421764
t Critical one-tailed	1.85955
P(T<=t) two-tailed	0.843529
t Critical two-tailed	2.306

## Sheet: MgCl.CaCl
Two Sample t-test Assuming Equal Variances
	Variable 1	Variable 2
Mean	71.8014	68.2608
Variance	467.379	452.442
Observations	5	5
Weighed variance	459.91
Hypothesized Mean Difference	0
df	8
t Stat	0.261042
P(T<=t) one-tailed	0.400327
t Critical one-tailed	1.85955
P(T<=t) two-tailed	0.800654
t Critical two-tailed	2.306

## Sheet: MgSO4.CaSO4
Two Sample t-test Assuming Equal Variances
	Variable 1	Variable 2
Mean	67.4372	67.6316
Variance	486.875	388.654
Observations	5	5
Weighed variance	437.765
Hypothesized Mean Difference	0
df	8
t Stat	-0.0146908
P(T<=t) one-tailed	0.494319
t Critical one-tailed	1.85955
P(T<=t) two-tailed	0.988639
t Critical two-tailed	2.306

## Sheet: ANOVA.t1
	You are using the XLSTAT trial version. Number of days remaining until the trial expires: 8
	XLSTAT 2019.3.2.61685 - ANOVA - Start time: 2019. 10. 04. at 16:44:40 / End time: 2019. 10. 04. at 16:44:41 / Microsoft Excel 16.04588
	Y / Dependent variables: Workbook = S1 Appendix.xlsx / Sheet = Data / Range = Data!$X$20:$X$70 / 50 rows and 1 column
	X / Qualitative: Workbook = S1 Appendix.xlsx / Sheet = Data / Range = Data!$U$20:$W$70 / 50 rows and 3 columns
	Constraints: an=0
	Confidence interval (%): 95
	Tolerance: 0,0001
	Use least squares means: Yes
	:
	Summary statistics (Quantitative data):
	Variable	Observations	Obs. with missing data	Obs. without missing data	Minimum	Maximum	Mean	Std. deviation
	t1 value	50	0	50	23.525	59.537	41.8232	9.99561
	Summary statistics (Qualitative data):
	Variable	Categories	Counts	Frequencies	%
	Cation	Al	5	5	10
		Ca	15	15	30
		Fe	5	5	10
		Mg	10	10	20
		Na	15	15	30
	Anion	Cl	15	15	30
		OH	10	10	20
		SO4	25	25	50
	Concentration	10 mg/l	10	10	20
		20 mg/l	10	10	20
		40 mg/l	10	10	20
		80 mg/l	10	10	20
		Control	10	10	20
	Correlation matrix:
		Cation-Al	Cation-Ca	Cation-Fe	Cation-Mg	Cation-Na	Anion-Cl	Anion-OH	Anion-SO4	Concentration-10 mg/l	Concentration-20 mg/l	Concentration-40 mg/l	Concentration-80 mg/l	Concentration-Control	t1 value
	Cation-Al	1	-0.218218	-0.111111	-0.166667	-0.218218	-0.218218	-0.166667	0.333333	-4.62593e-18	-2.31296e-17	4.62593e-18	-7.40149e-17	-4.62593e-18	-0.258976
	Cation-Ca	-0.218218	1	-0.218218	-0.327327	-0.428571	0.047619	0.218218	-0.218218	3.1798e-17	2.42271e-17	-2.19558e-17	1.21135e-17	1.66561e-17	-0.129069
	Cation-Fe	-0.111111	-0.218218	1	-0.166667	-0.218218	-0.218218	-0.166667	0.333333	-1.73472e-17	-1.61908e-17	9.25186e-18	-1.38778e-17	-3.5851e-17	-0.202221
	Cation-Mg	-0.166667	-0.327327	-0.166667	1	-0.327327	0.218218	-0.25	2.77556e-18	0	0	-4.33681e-18	0	-6.93889e-18	0.0363501
	Cation-Na	-0.218218	-0.428571	-0.218218	-0.327327	1	0.047619	0.218218	-0.218218	1.21135e-17	6.05676e-18	-2.27129e-17	-9.08514e-18	3.63406e-17	0.399264
	Anion-Cl	-0.218218	0.047619	-0.218218	0.218218	0.047619	1	-0.327327	-0.654654	7.57095e-18	6.05676e-18	-2.95267e-17	3.02838e-18	2.27129e-17	-0.100444
	Anion-OH	-0.166667	0.218218	-0.166667	-0.25	0.218218	-0.327327	1	-0.5	0	0	0	3.46945e-17	0	0.0870821
	Anion-SO4	0.333333	-0.218218	0.333333	2.77556e-18	-0.218218	-0.654654	-0.5	1	2.77556e-18	0	4.16334e-18	0	2.77556e-18	0.0223928
	Concentration-10 mg/l	-4.62593e-18	3.1798e-17	-1.73472e-17	0	1.21135e-17	7.57095e-18	0	2.77556e-18	1	-0.25	-0.25	-0.25	-0.25	0.0838734
	Concentration-20 mg/l	-2.31296e-17	2.42271e-17	-1.61908e-17	0	6.05676e-18	6.05676e-18	0	0	-0.25	1	-0.25	-0.25	-0.25	-0.0343007
	Concentration-40 mg/l	4.62593e-18	-2.19558e-17	9.25186e-18	-4.33681e-18	-2.27129e-17	-2.95267e-17	0	4.16334e-18	-0.25	-0.25	1	-0.25	-0.25	-0.225475
	Concentration-80 mg/l	-7.40149e-17	1.21135e-17	-1.38778e-17	0	-9.08514e-18	3.02838e-18	3.46945e-17	0	-0.25	-0.25	-0.25	1	-0.25	-0.337005
	Concentration-Control	-4.62593e-18	1.66561e-17	-3.5851e-17	-6.93889e-18	3.63406e-17	2.27129e-17	0	2.77556e-18	-0.25	-0.25	-0.25	-0.25	1	0.512907
	t1 value	-0.258976	-0.129069	-0.202221	0.0363501	0.399264	-0.100444	0.0870821	0.0223928	0.0838734	-0.0343007	-0.225475	-0.337005	0.512907	1
	Multicolinearity statistics:
		Cation-Al	Cation-Ca	Cation-Fe	Cation-Mg	Cation-Na	Anion-Cl	Anion-OH	Anion-SO4	Concentration-10 mg/l	Concentration-20 mg/l	Concentration-40 mg/l	Concentration-80 mg/l	Concentration-Control
	Tolerance	0.888889	0.936508	0.888889	0.916667	0.936508	0.873016	0.833333	0.733333	1	1	1	1	1
	VIF	1.125	1.0678	1.125	1.09091	1.0678	1.14545	1.2	1.36364	1	1	1	1	1
	Regression of variable t1 value:
	Goodness of fit statistics (t1 value):
	Observations	50
	Sum of weights	50
	DF	39
	R²	0.634096
	Adjusted R²	0.540274
	MSE	45.9322
	RMSE	6.77733
	MAPE	12.0226
	DW	1.7884
	Cp	11
	AIC	200.935
	SBC	221.967
	PC	0.572312
	Press	3041.99
	Q²	0.378639
	Analysis of variance (t1 value):
	Source	DF	Sum of squares	Mean squares	F	Pr > F
	Model	10	3104.34	310.434	6.75853	< 0,0001
	Error	39	1791.36	45.9322
	Corrected Total	49	4895.7
	Computed against model Y=Mean(Y)
	Type I Sum of Squares analysis (t1 value):
	Source	DF	Sum of squares	Mean squares	F	Pr > F
	Cation	4	1084.26	271.065	5.90142	0.000819613
	Anion	2	313.651	156.826	3.41429	0.0430132
	Concentration	4	1706.43	426.607	9.28776	< 0,0001
	Type II Sum of Squares analysis (t1 value):
	Source	DF	Sum of squares	Mean squares	F	Pr > F
	Cation	4	1332.41	333.102	7.25205	0.000182019
	Anion	2	313.651	156.826	3.41429	0.0430132
	Concentration	4	1706.43	426.607	9.28776	< 0,0001
	Type III Sum of Squares analysis (t1 value):
	Source	DF	Sum of squares	Mean squares	F	Pr > F
	Cation	4	1332.41	333.102	7.25205	0.000182019
	Anion	2	313.651	156.826	3.41429	0.0430132
	Concentration	4	1706.43	426.607	9.28776	< 0,0001
	Model parameters (t1 value):
	Source	Value	Standard error	t	Pr > |t|	Lower bound (95%)	Upper bound (95%)
	Intercept	61.3936	3.00555	20.4267	< 0,0001	55.3143	67.4729
	Cation-Al	-17.1076	3.81382	-4.48569	< 0,0001	-24.8218	-9.39345
	Cation-Ca	-7.9858	2.47473	-3.22694	0.0025362	-12.9914	-2.98018
	Cation-Fe	-15.4228	3.81382	-4.04393	0.000240091	-23.137	-7.70865
	Cation-Mg	-5.47485	2.90188	-1.88666	0.0666675	-11.3445	0.394755
	Cation-Na	0	0
	Anion-Cl	-6.45113	2.47473	-2.6068	0.0128797	-11.4567	-1.44552
	Anion-OH	-3.70352	2.90188	-1.27625	0.209416	-9.57312	2.16609
	Anion-SO4	0	0
	Concentration-10 mg/l	-8.4907	3.03091	-2.80137	0.00787995	-14.6213	-2.3601
	Concentration-20 mg/l	-10.8294	3.03091	-3.57298	0.000958263	-16.96	-4.6988
	Concentration-40 mg/l	-14.6128	3.03091	-4.82125	< 0,0001	-20.7434	-8.4822
	Concentration-80 mg/l	-16.82	3.03091	-5.54948	< 0,0001	-22.9506	-10.6894
	Concentration-Control	0	0
	Equation of the model (t1 value):
	t1 value = 61,3935966666667-17,1076166666667*Cation-Al-7,9858*Cation-Ca-15,4228166666667*Cation-Fe-5,47485*Cation-Mg-6,45113333333334*Anion-Cl-3,70351666666667*Anion-OH-8,49069999999999*Concentration-10 mg/l-10,8294*Concentration-20 mg/l-14,6128*Concentration-40 mg/l-16,82*Concentration-80 mg/l
	Standardized coefficients (t1 value):
	Source	Value	Standard error	t	Pr > |t|	Lower bound (95%)	Upper bound (95%)
	Cation-Al	-0.518667	0.115627	-4.48569	< 0,0001	-0.752544	-0.284789
	Cation-Ca	-0.369833	0.114608	-3.22694	0.0025362	-0.60165	-0.138016
	Cation-Fe	-0.467587	0.115627	-4.04393	0.000240091	-0.701465	-0.23371
	Cation-Mg	-0.221315	0.117305	-1.88666	0.0666675	-0.458587	0.0159575
	Cation-Na	0	0
	Anion-Cl	-0.298761	0.114608	-2.6068	0.0128797	-0.530577	-0.0669439
	Anion-OH	-0.14971	0.117305	-1.27625	0.209416	-0.386982	0.0875616
	Anion-SO4	0	0
	Concentration-10 mg/l	-0.343227	0.122521	-2.80137	0.00787995	-0.591049	-0.0954043
	Concentration-20 mg/l	-0.437766	0.122521	-3.57298	0.000958263	-0.685589	-0.189944
	Concentration-40 mg/l	-0.590706	0.122521	-4.82125	< 0,0001	-0.838528	-0.342883
	Concentration-80 mg/l	-0.679929	0.122521	-5.54948	< 0,0001	-0.927752	-0.432107
	Concentration-Control	0	0
	Predictions and residuals (t1 value):
	Observation	Weight	t1 value	Pred(t1 value)	Residual	Std. residual	Std. dev. on pred. (Mean)	Lower bound 95% (Mean)	Upper bound 95% (Mean)	Std. dev. on pred. (Observation)	Lower bound 95% (Observation)	Upper bound 95% (Observation)
	Obs1	1	45.507	57.6901	-12.1831	-1.79762	3.13031	51.3584	64.0217	7.46532	42.59	72.7901
	Obs2	1	55.682	49.1994	6.48262	0.956515	3.13031	42.8677	55.531	7.46532	34.0993	64.2994
	Obs3	1	53.251	46.8607	6.39032	0.942896	3.13031	40.529	53.1923	7.46532	31.7606	61.9607
	Obs4	1	50.221	43.0773	7.14372	1.05406	3.13031	36.7456	49.4089	7.46532	27.9772	58.1773
	Obs5	1	48.86	40.8701	7.98992	1.17892	3.13031	34.5384	47.2017	7.46532	25.77	55.9701
	Obs6	1	45.507	54.9425	-9.43546	-1.39221	3.00555	48.8632	61.0218	7.41387	39.9465	69.9384
	Obs7	1	43.43	46.4518	-3.02176	-0.445863	3.00555	40.3725	52.5311	7.41387	31.4558	61.4477
	Obs8	1	42.611	44.1131	-1.50206	-0.221631	3.00555	38.0338	50.1924	7.41387	29.1171	59.109
	Obs9	1	43.006	40.3297	2.67634	0.394895	3.00555	34.2504	46.409	7.41387	25.3337	55.3256
	Obs10	1	42.441	38.1225	4.31854	0.637203	3.00555	32.0432	44.2018	7.41387	23.1265	53.1184
	Obs11	1	51.66	61.3936	-9.7336	-1.4362	3.00555	55.3143	67.4729	7.41387	46.3976	76.3896
	Obs12	1	48.651	52.9029	-4.2519	-0.627371	3.00555	46.8236	58.9822	7.41387	37.9069	67.8989
	Obs13	1	49.769	50.5642	-0.795197	-0.117332	3.00555	44.4849	56.6435	7.41387	35.5682	65.5602
	Obs14	1	49.272	46.7808	2.4912	0.367579	3.00555	40.7015	52.8601	7.41387	31.7848	61.7768
	Obs15	1	48.004	44.5736	3.4304	0.506159	3.00555	38.4943	50.6529	7.41387	29.5776	59.5696
	Obs16	1	51.66	49.7043	1.95572	0.288568	3.13031	43.3726	56.0359	7.46532	34.6042	64.8043
	Obs17	1	43.572	41.2136	2.35842	0.347987	3.13031	34.8819	47.5452	7.46532	26.1135	56.3136
	Obs18	1	36.471	38.8749	-2.40388	-0.354694	3.13031	32.5432	45.2065	7.46532	23.7748	53.9749
	Obs19	1	26.717	35.0915	-8.37448	-1.23566	3.13031	28.7598	41.4231	7.46532	19.9914	50.1915
	Obs20	1	23.525	32.8843	-9.35928	-1.38097	3.13031	26.5526	39.2159	7.46532	17.7842	47.9843
	Obs21	1	44.721	46.9567	-2.23566	-0.329874	3.00555	40.8774	53.036	7.41387	31.9607	61.9526
	Obs22	1	40.283	38.466	1.81704	0.268105	3.00555	32.3867	44.5453	7.41387	23.47	53.4619
	Obs23	1	39.416	36.1273	3.28874	0.485256	3.00555	30.048	42.2066	7.41387	21.1313	51.1232
	Obs24	1	33.278	32.3439	0.934137	0.137833	3.00555	26.2646	38.4232	7.41387	17.3479	47.3398
	Obs25	1	30.906	30.1367	0.769337	0.113516	3.00555	24.0574	36.216	7.41387	15.1407	45.1326
	Obs26	1	44.721	53.4078	-8.6868	-1.28174	3.00555	47.3285	59.4871	7.41387	38.4118	68.4038
	Obs27	1	49.926	44.9171	5.0089	0.739067	3.00555	38.8378	50.9964	7.41387	29.9211	59.9131
	Obs28	1	49.931	42.5784	7.3526	1.08488	3.00555	36.4991	48.6577	7.41387	27.5824	57.5744
	Obs29	1	45.053	38.795	6.258	0.923373	3.00555	32.7157	44.8743	7.41387	23.799	53.791
	Obs30	1	37.905	36.5878	1.3172	0.194354	3.00555	30.5085	42.6671	7.41387	21.5918	51.5838
	Obs31	1	59.537	49.4676	10.0694	1.48575	3.13031	43.136	55.7993	7.46532	34.3676	64.5677
	Obs32	1	45.712	40.9769	4.73509	0.698666	3.13031	34.6453	47.3086	7.46532	25.8769	56.077
	Obs33	1	34.996	38.6382	-3.64221	-0.537411	3.13031	32.3066	44.9699	7.46532	23.5382	53.7383
	Obs34	1	29.878	34.8548	-4.97681	-0.734333	3.13031	28.5232	41.1865	7.46532	19.7548	49.9549
	Obs35	1	28.853	32.6476	-3.79461	-0.559898	3.13031	26.316	38.9793	7.46532	17.5476	47.7477
	Obs36	1	58.444	55.9187	2.52525	0.372603	3.13031	49.5871	62.2504	7.46532	40.8187	71.0188
	Obs37	1	47.188	47.428	-0.240047	-0.0354191	3.13031	41.0964	53.7597	7.46532	32.328	62.5281
	Obs38	1	48.505	45.0893	3.41565	0.503982	3.13031	38.7577	51.421	7.46532	29.9893	60.1894
	Obs39	1	37.791	41.3059	-3.51495	-0.518633	3.13031	34.9743	47.6376	7.46532	26.2059	56.406
	Obs40	1	34.522	39.0987	-4.57675	-0.675302	3.13031	32.7671	45.4304	7.46532	23.9987	54.1988
	Obs41	1	58.444	45.9708	12.4732	1.84043	3.58623	38.717	53.2246	7.66767	30.4614	61.4801
	Obs42	1	33.683	37.4801	-3.79708	-0.560262	3.58623	30.2263	44.7339	7.66767	21.9707	52.9894
	Obs43	1	30.084	35.1414	-5.05738	-0.74622	3.58623	27.8876	42.3952	7.66767	19.632	50.6507
	Obs44	1	29.598	31.358	-1.75998	-0.259686	3.58623	24.1042	38.6118	7.66767	15.8486	46.8673
	Obs45	1	27.292	29.1508	-1.85878	-0.274264	3.58623	21.897	36.4046	7.66767	13.6414	44.6601
	Obs46	1	59.537	44.286	15.251	2.2503	3.58623	37.0322	51.5398	7.66767	28.7766	59.7953
	Obs47	1	26.704	35.7953	-9.09128	-1.34143	3.58623	28.5415	43.0491	7.66767	20.2859	51.3046
	Obs48	1	26.41	33.4566	-7.04658	-1.03973	3.58623	26.2028	40.7104	7.66767	17.9472	48.9659
	Obs49	1	28.796	29.6732	-0.87718	-0.129429	3.58623	22.4194	36.927	7.66767	14.1638	45.1825
	Obs50	1	29.23	27.466	1.76402	0.260282	3.58623	20.2122	34.7198	7.66767	11.9566	42.9753
	Interpretation (t1 value):
	Given the R2, 63% of the variability of the dependent variable t1 value is explained by the 3 explanatory variables.
	Given the p-value of the F statistic computed in the ANOVA table, and given the significance level of 5%, the information brought by the explanatory variables is significantly better than what a basic mean would bring.
	Based on the Type III sum of squares, the following variables bring significant information to explain the variability of the dependent variable t1 value: Cation,Anion,Concentration.
	Among the explanatory variables, based on the Type III sum of squares, variable Concentration is the most influential.
	LS Means for factor Cation:
	Category	LS mean	Standard error	Lower bound (95%)	Upper bound (95%)
	Al	30.7505	3.38866	23.8963	37.6047
	Ca	39.8723	1.7499	36.3328	43.4118
	Fe	32.4353	3.38866	25.5811	39.2895
	Mg	42.3833	2.3149	37.701	47.0656
	Na	47.8581	1.7499	44.3186	51.3976
	LS Means for factor Anion:
	Category	LS mean	Standard error	Lower bound (95%)	Upper bound (95%)
	Cl	35.5937	2.07051	31.4057	39.7817
	OH	38.3413	2.56586	33.1514	43.5312
	SO4	42.0448	1.35547	39.3031	44.7865
	LS Means for factor Concentration:
	Category	LS mean	Standard error	Lower bound (95%)	Upper bound (95%)
	10 mg/l	40.3198	2.3149	35.6375	45.0021
	20 mg/l	37.9811	2.3149	33.2988	42.6634
	40 mg/l	34.1977	2.3149	29.5154	38.88
	80 mg/l	31.9905	2.3149	27.3082	36.6728
	Control	48.8105	2.3149	44.1282	53.4928

## Sheet: FeSO4.AlSO4, half
Two Sample t-test Assuming Equal Variances
	Variable 1	Variable 2
Mean	35.8202	34.1354
Variance	165.188	203.18
Observations	5	5
Weighed variance	184.184
Hypothesized Mean Difference	0
df	8
t Stat	0.196287
P(T<=t) one-tailed	0.42464
t Critical one-tailed	1.85955
P(T<=t) two-tailed	0.84928
t Critical two-tailed	2.306

## Sheet: MgCl.CaCl, half 
Two Sample t-test Assuming Equal Variances
	Variable 1	Variable 2
Mean	39.7952	37.7208
Variance	166.466	31.1553
Observations	5	5
Weighed variance	98.8104
Hypothesized Mean Difference	0
df	8
t Stat	0.32996
P(T<=t) one-tailed	0.374952
t Critical one-tailed	1.85955
P(T<=t) two-tailed	0.749905
t Critical two-tailed	2.306

## Sheet: MgSO4.CaSO4, half
Two Sample t-test Assuming Equal Variances
	Variable 1	Variable 2
Mean	45.29	45.5072
Variance	89.7878	24.4284
Observations	5	5
Weighed variance	57.1081
Hypothesized Mean Difference	0
df	8
t Stat	-0.0454445
P(T<=t) one-tailed	0.482433
t Critical one-tailed	1.85955
P(T<=t) two-tailed	0.964867
t Critical two-tailed	2.306
